# Supplementary material
Source: PubMed Central journal article supplement (PMC6522599)

Supplementary Fig 1

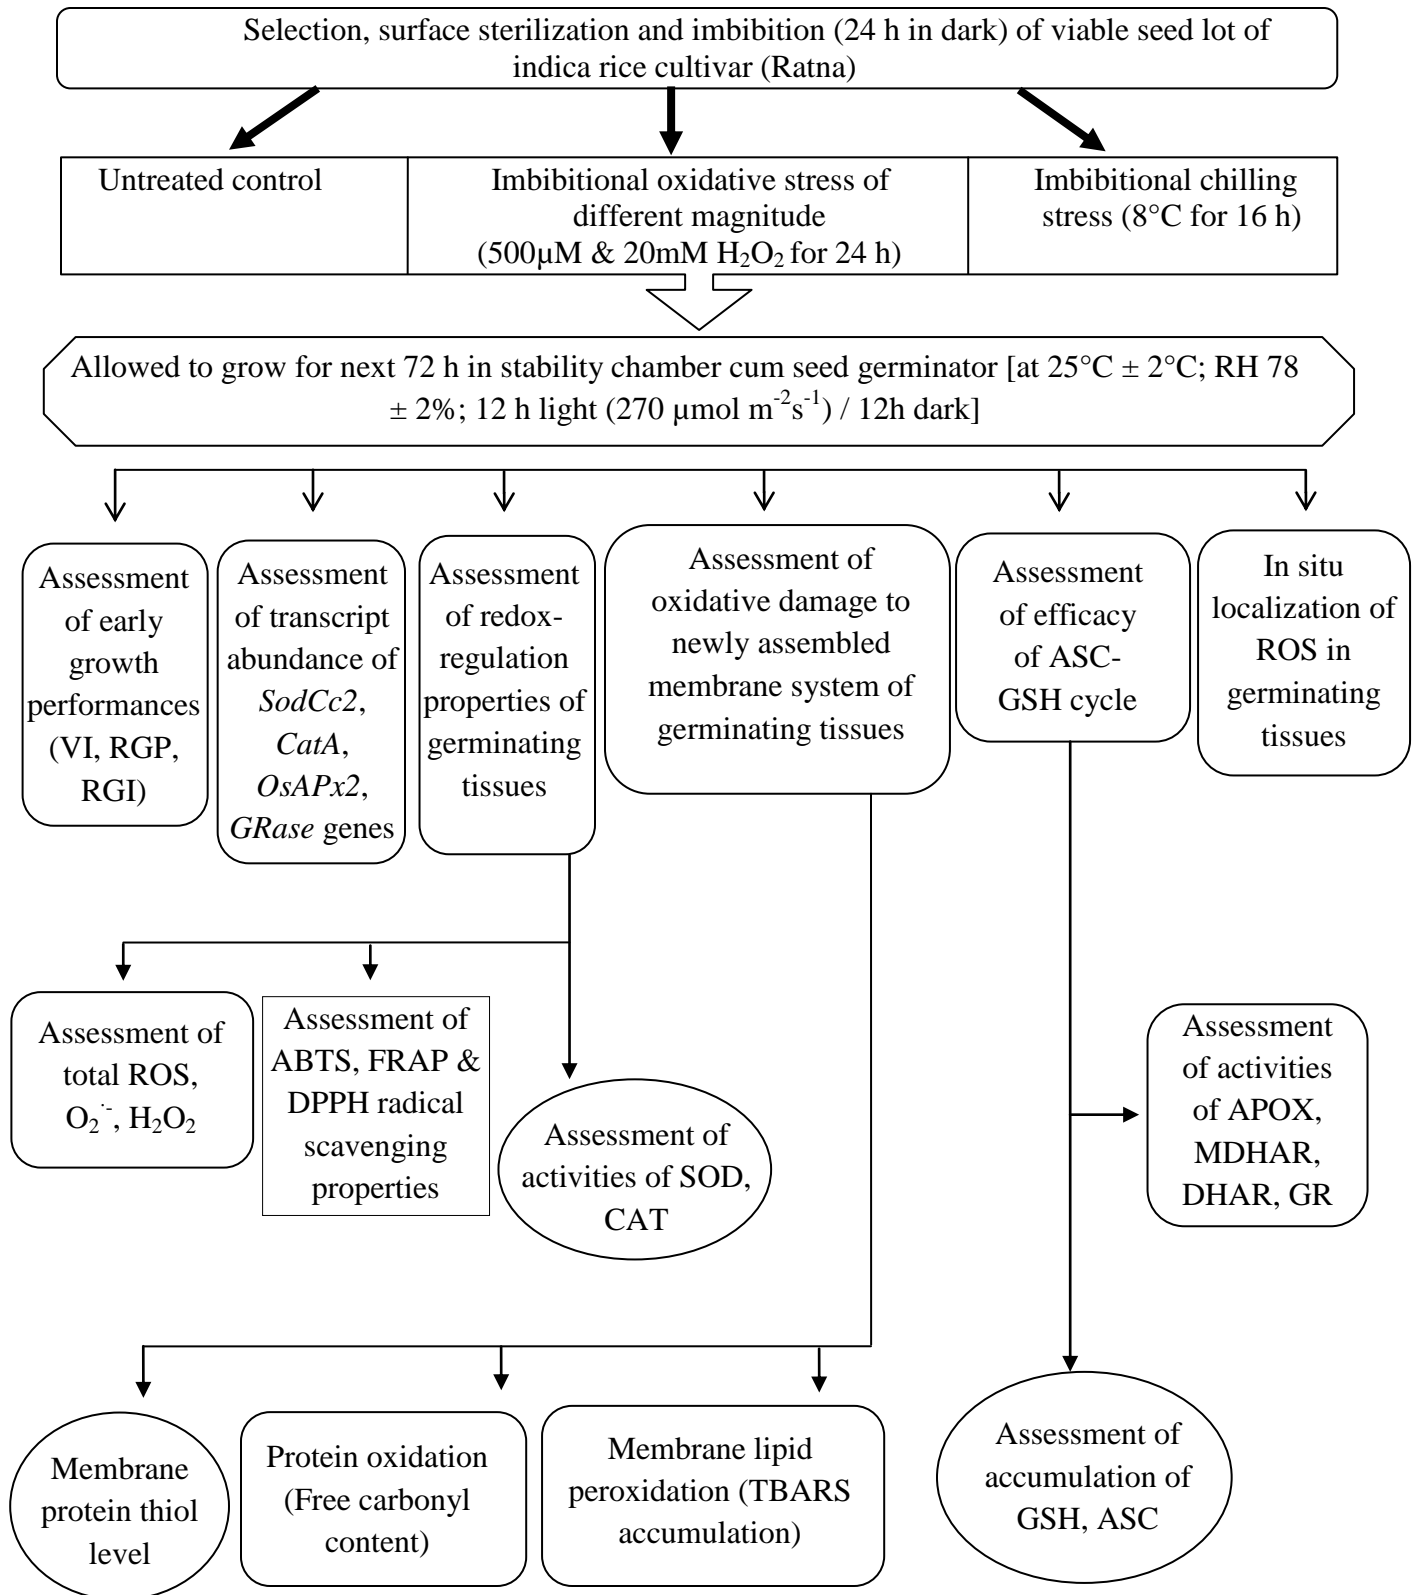

Supplementary Fig 2

Imposition of imbibitional oxidative and chilling stress of different magnitude to indica rice cultivar Ratna

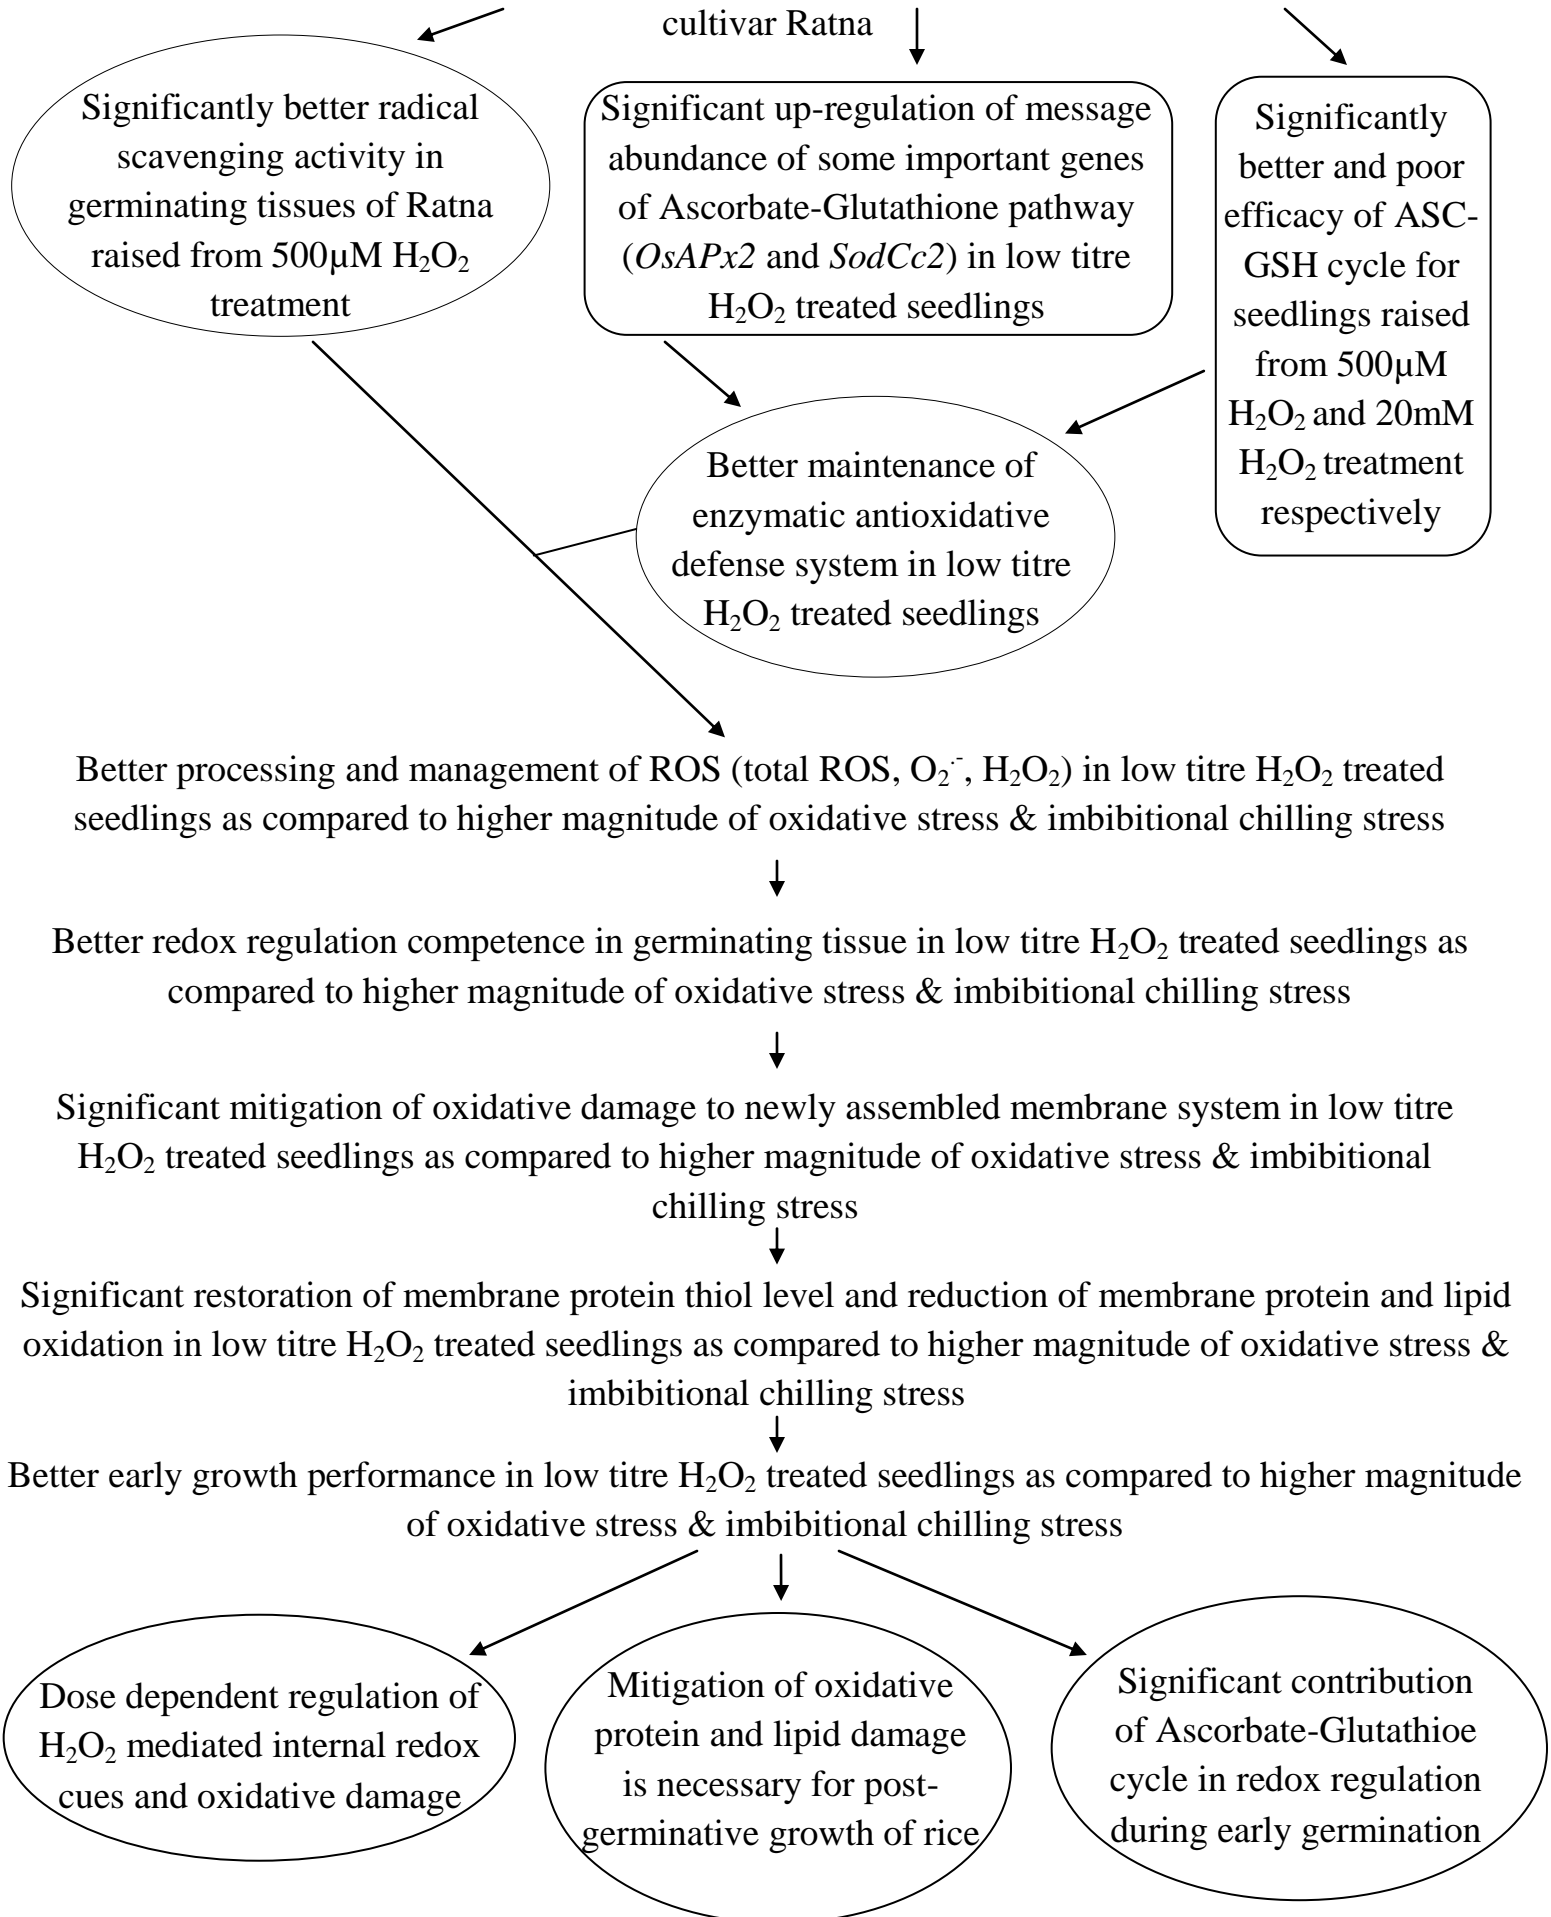

Supplement: 12298_2019_656_MOESM1_ESM.pdf [file 12298_2019_656_MOESM1_ESM.pdf]
