# Supplementary material
Source: PubMed Central journal article supplement (PMC6522599)
Supplement: 12298_2019_656_MOESM2_ESM.pdf [file 12298_2019_656_MOESM2_ESM.pdf]

Supplementary Table: 1 List of primers used for semi-quantitative RT- PCR

| Gene names              | Accession Number | Primer identity               |                                |
|-------------------------|------------------|-------------------------------|--------------------------------|
|                         |                  | F                             | R                              |
| <i>SodCc2</i>           | L19434           | 5'-ATTGGCCGAGCTGTTGTTGTCC-3'  | 5'-TAACCCTGGAGTCCGATGATTCCG-3' |
| <i>CatA</i>             | EF371902         | 5'-AAGCTGTTCGTCCAGGTGATCG-3'  | 5'-TGTCGACGTTGCGGTTGAGAAC-3'   |
| <i>OsAPx2</i>           | AK068430         | 5'-TCTTCCTGATGCCACACAAGGTT-3' | 5'-TCCTTGTCACTCAAACCCATCTGC-3' |
| <i>GRase</i>            | NM001055020      | 5'-CGACCTTTGACAGCACTGTTGG-3'  | 5'-TGGTCAAGGTCCGCATTGTAC-3'    |
| 18S rRNA ( <i>Hsk</i> ) | AB047313         | 5'-CTACGTCCCTGCCCTTTGTACA-3'  | 5'-ACACTTCACCGGACCATTCAA-3'    |
